# Supplementary material for: Identification of GLI1 and KIAA0825 Variants in Two Families with Postaxial Polydactyly
Source: MDPI journal article supplement (doi:10.3390/genes14040869), 2023-04-05
Supplement: s1 [file s1]

**Table S1.** Protein-Protein interaction of the wildtype and mutant KIAA0825 with C1ORF167 and the wildtype and mutant GLI1 with SUFU

| <b>KIAA0825-C1orf167 Interaction</b>             |                                               |                                                                   |                                                                       |                                   |
|--------------------------------------------------|-----------------------------------------------|-------------------------------------------------------------------|-----------------------------------------------------------------------|-----------------------------------|
| <b>Interacting portein</b>                       | <b>Wildtype KIAA0825 Interacting residues</b> | <b>Mutant (p.Pro1191Leu) KIAA0825 Interacting residues</b>        | <b>Close Interactor C1orf167 residues</b>                             | <b>Number &amp; type of Bond</b>  |
| Wildtype KIAA0825-C1orf167                       | Lys105, Glu107, Gln187, Ser246                | _____                                                             | Ser1412, Lys1422, Glu1425, Glu1429,His1308                            | 3 hydrogen bonds & 2 salt bridges |
| Mutant (p.Pro1191Leu ) KIAA0825-C1orf167         | _____                                         | Gln864, Glu875, Arg925, Tyr950, Glu1027, Asp1028,Glu1078, Asn1271 | Arg4, Lys16, Arg111, Lys114, Gln466, Val833, Gln971, Gly1015, Arg1432 | 7 hydrogen bonds & 2 salt bridges |
| <b>GLI1-SUFU Interaction</b>                     |                                               |                                                                   |                                                                       |                                   |
| <b>Interacting proteins</b>                      | <b>Wildtype GLI1 Interacting residues</b>     | <b>Mutant (p.Arg113*) GLI1 Interacting residues</b>               | <b>Close Interactor SUFU residues</b>                                 | <b>Number &amp; type of Bonds</b> |
| Wildtype GLI1-SUFU Protein Interaction           | Asp347, Gly526, His983, Pro 989, Arg990       | _____                                                             | Asp47, Arg75, Glu86, Glu127, Gly241                                   | 3 hydrogen bonds & 3 salt bridges |
| Mutant (p.Arg113*) GLI1-SUFU Protein Interaction | _____                                         | Asn45, Ser92, Val98, Ser112                                       | Thr13, Asp47, Gln53,Pro133                                            | 4Hydrogen bonds                   |
